# Supplementary material for: pH-Responsible Doxorubicin-Loaded Fe3O4@CaCO3 Nanocomposites for Cancer Treatment
Source: MDPI journal article supplement (doi:10.3390/pharmaceutics15030771), 2023-02-26
Supplement: s1 [file s1]

## pH-responsive Doxorubicin-loaded Fe<sub>3</sub>O<sub>4</sub>@CaCO<sub>3</sub> Nanocomposites for Cancer Treatment

Victoriya Popova, Yuliya Poletaeva, Alexey Chubarov and Elena Dmitrienko

Institute of Chemical Biology and Fundamental Medicine (ICBFM), Siberian Branch of Russian Academy of Sciences, 8 Lavrentiev Avenue, 630090 Novosibirsk, Russia

- Figure S1.** DLS size distribution of Fe<sub>3</sub>O<sub>4</sub>@CaCO<sub>3</sub> (0.45 mg/mL of Fe<sub>3</sub>O<sub>4</sub> synthesis) by number (top), volume (middle) and intensity (bottom) obtained by adding 0.45 mg/mL. ....2
- Figure S2.** DLS size distribution of Fe<sub>3</sub>O<sub>4</sub>@CaCO<sub>3</sub> by number (top), volume (middle), intensity (bottom) after 5 months of storage at 7 °C in deionized water. The particle size was determined by DLS (139 ± 5 nm, PDI of 0.33 ± 0.01). ....3
- Figure S3.** The hydrodynamic diameter by DLS of Fe<sub>3</sub>O<sub>4</sub>@CaCO<sub>3</sub> in various solutions. ....3
- Figure S4.** Possible nanoparticle interactions with doxorubicin (DOX). ....4
- Figure S5.** The proportion of DOX release from Fe<sub>3</sub>O<sub>4</sub>@CaCO<sub>3</sub>/DOX (capacity, 25–1900 µg/mg) at pH 4.0 (A, C); pH 6.0 (B, D). ....5
- Figure S6.** The confirmation of DOX-loading by photography. The left photography also shows magnetic behavior on the magnetic tube rack. ....5
- Figure S7.** Fluorescence and UV-vis spectra of Fe<sub>3</sub>O<sub>4</sub>@CaCO<sub>3</sub>/DOX nanocomposites. The measurements were carried out using 100 µl of the solution on the Clariostar (BMG Labtech, Ortenberg, Germany). ....5

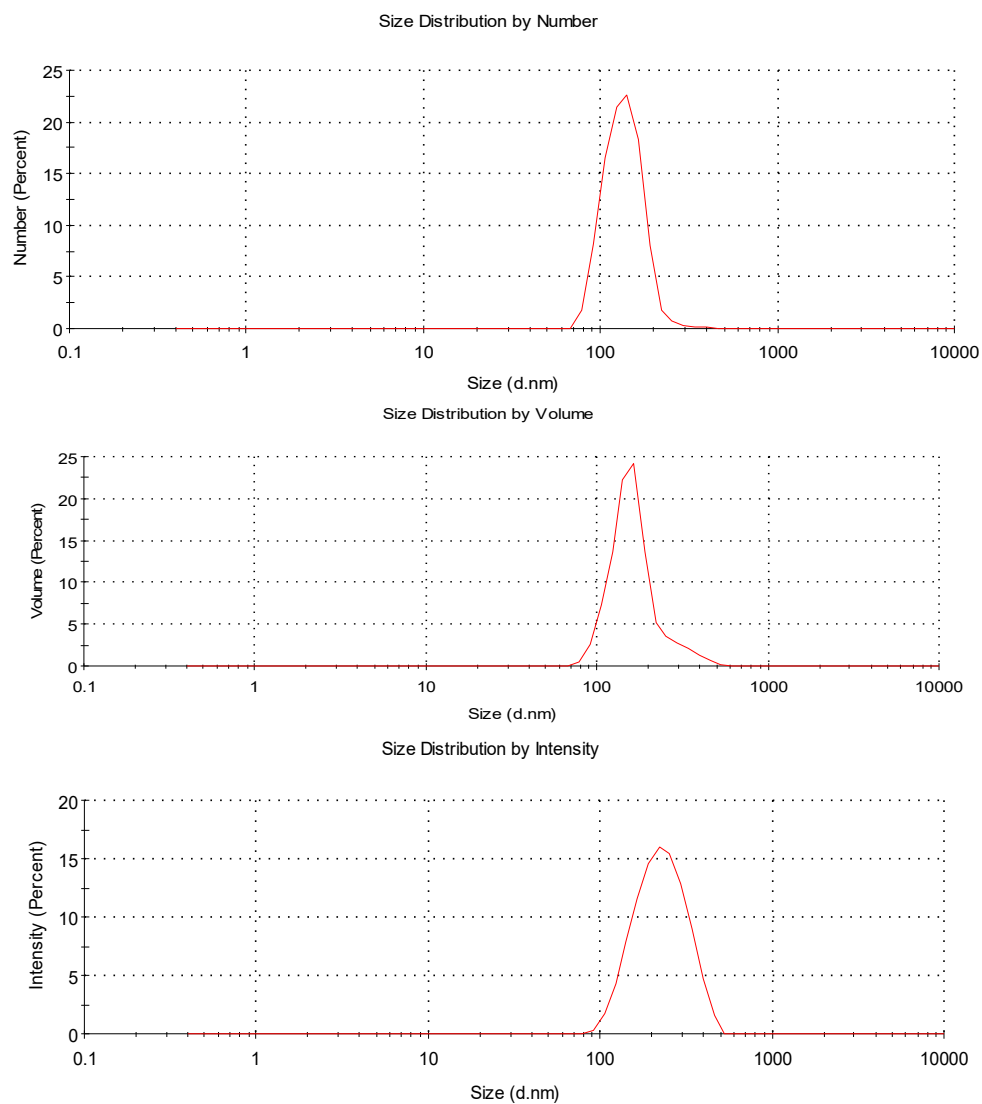

**Figure S1.** DLS size distribution of  $\text{Fe}_3\text{O}_4@\text{CaCO}_3$  (0.45 mg/mL of  $\text{Fe}_3\text{O}_4$  synthesis) by number (top), volume (middle) and intensity (bottom) obtained by adding 0.45 mg/mL.

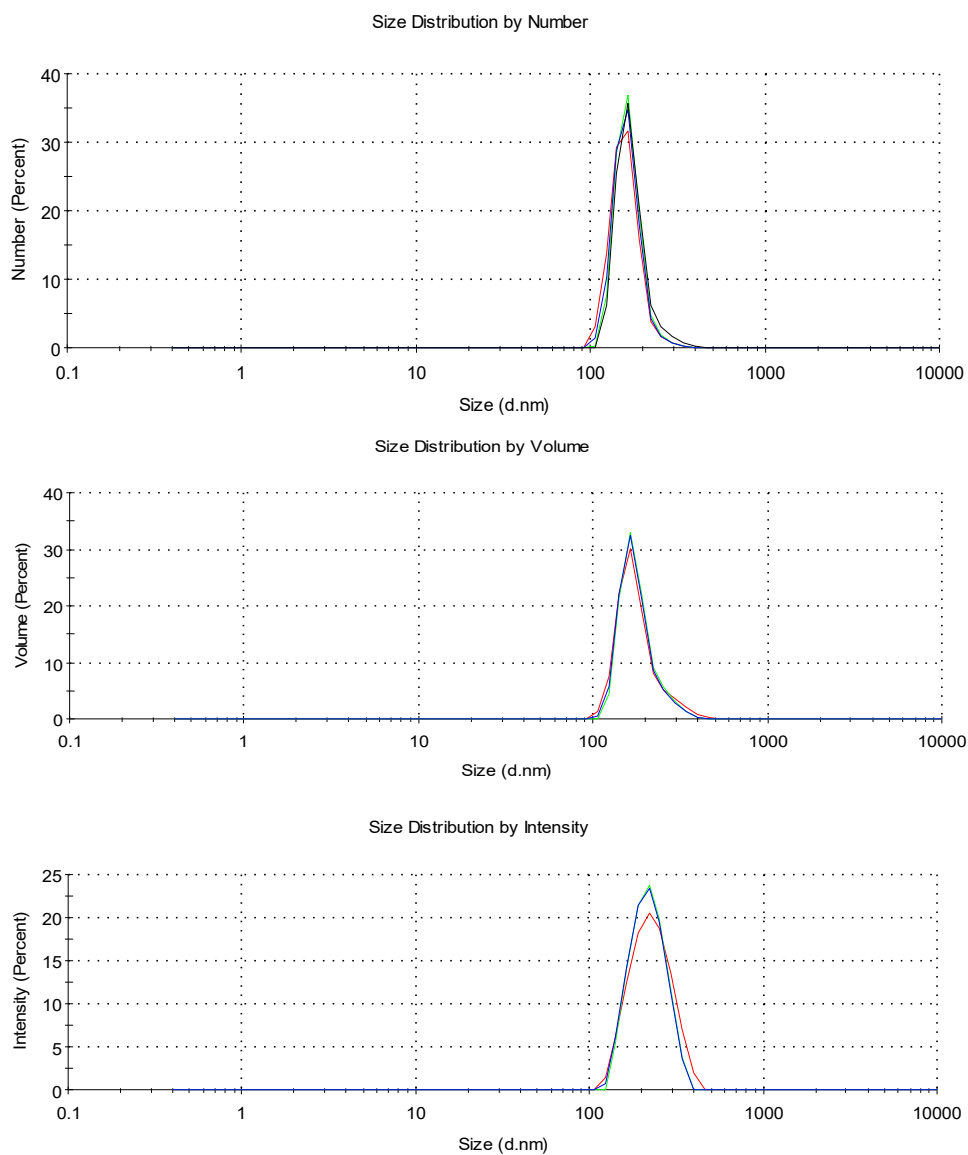

**Figure S2.** DLS size distribution of  $\text{Fe}_3\text{O}_4@ \text{CaCO}_3$  by number (top), volume (middle), intensity (bottom) after 5 months of storage at 7 °C in deionized water. The particle size was determined by DLS ( $139 \pm 5$  nm, PDI of  $0.33 \pm 0.01$ ).

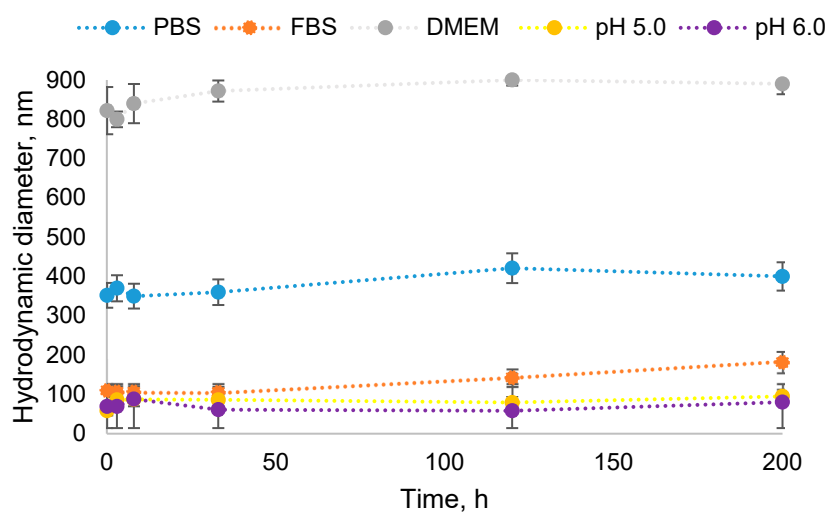

**Figure S3.** The hydrodynamic diameter by DLS of  $\text{Fe}_3\text{O}_4@ \text{CaCO}_3$  in various solutions.

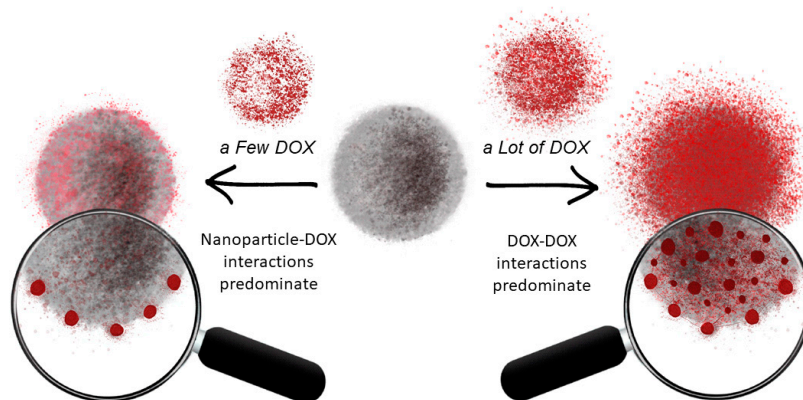

**Figure S4.** Possible nanoparticle interactions with doxorubicin (DOX).

### A pH 4.0

- $\text{Fe}_3\text{O}_4@\text{CaCO}_3/\text{DOX1900}$     ●  $\text{Fe}_3\text{O}_4@\text{CaCO}_3/\text{DOX1045}$
- $\text{Fe}_3\text{O}_4@\text{CaCO}_3/\text{DOX525}$     ●  $\text{Fe}_3\text{O}_4@\text{CaCO}_3/\text{DOX295}$
- $\text{Fe}_3\text{O}_4@\text{CaCO}_3/\text{DOX160}$     ●  $\text{Fe}_3\text{O}_4@\text{CaCO}_3/\text{DOX73}$
- $\text{Fe}_3\text{O}_4@\text{CaCO}_3/\text{DOX45}$     ●  $\text{Fe}_3\text{O}_4@\text{CaCO}_3/\text{DOX25}$

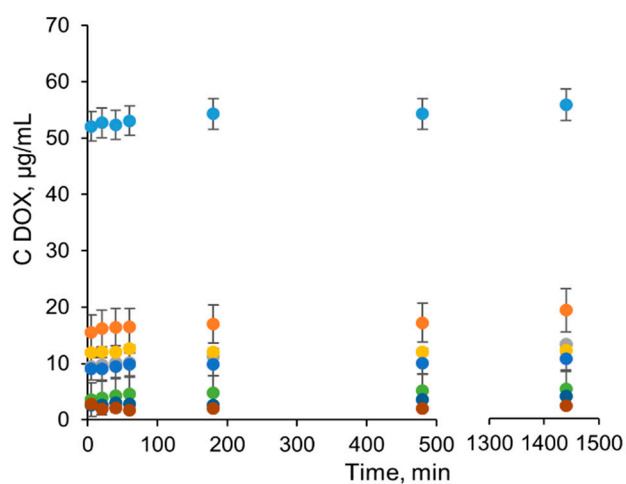

### B pH 6.0

- $\text{Fe}_3\text{O}_4@\text{CaCO}_3/\text{DOX1900}$     ●  $\text{Fe}_3\text{O}_4@\text{CaCO}_3/\text{DOX1045}$
- $\text{Fe}_3\text{O}_4@\text{CaCO}_3/\text{DOX525}$     ●  $\text{Fe}_3\text{O}_4@\text{CaCO}_3/\text{DOX295}$
- $\text{Fe}_3\text{O}_4@\text{CaCO}_3/\text{DOX160}$     ●  $\text{Fe}_3\text{O}_4@\text{CaCO}_3/\text{DOX73}$
- $\text{Fe}_3\text{O}_4@\text{CaCO}_3/\text{DOX45}$     ●  $\text{Fe}_3\text{O}_4@\text{CaCO}_3/\text{DOX25}$

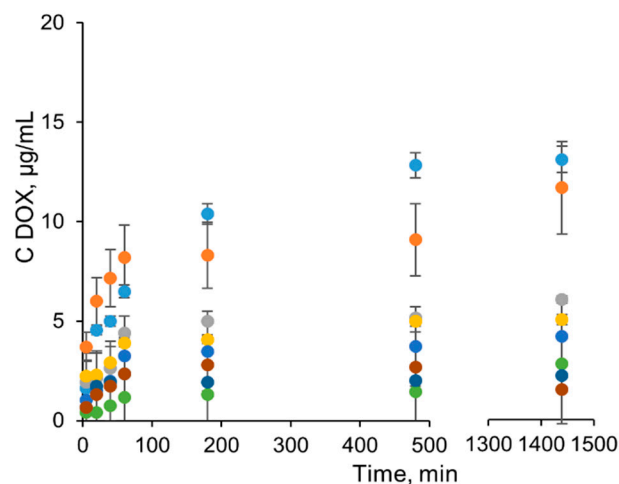

### C pH 4.0

- $\text{Fe}_3\text{O}_4@\text{CaCO}_3/\text{DOX1900}$     ●  $\text{Fe}_3\text{O}_4@\text{CaCO}_3/\text{DOX1045}$
- $\text{Fe}_3\text{O}_4@\text{CaCO}_3/\text{DOX525}$     ●  $\text{Fe}_3\text{O}_4@\text{CaCO}_3/\text{DOX295}$
- $\text{Fe}_3\text{O}_4@\text{CaCO}_3/\text{DOX160}$     ●  $\text{Fe}_3\text{O}_4@\text{CaCO}_3/\text{DOX73}$
- $\text{Fe}_3\text{O}_4@\text{CaCO}_3/\text{DOX45}$     ●  $\text{Fe}_3\text{O}_4@\text{CaCO}_3/\text{DOX25}$

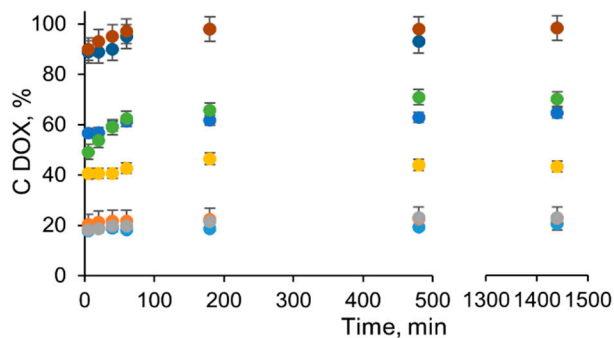

### D pH 6.0

- $\text{Fe}_3\text{O}_4@\text{CaCO}_3/\text{DOX1900}$     ●  $\text{Fe}_3\text{O}_4@\text{CaCO}_3/\text{DOX1045}$
- $\text{Fe}_3\text{O}_4@\text{CaCO}_3/\text{DOX525}$     ●  $\text{Fe}_3\text{O}_4@\text{CaCO}_3/\text{DOX295}$
- $\text{Fe}_3\text{O}_4@\text{CaCO}_3/\text{DOX160}$     ●  $\text{Fe}_3\text{O}_4@\text{CaCO}_3/\text{DOX73}$
- $\text{Fe}_3\text{O}_4@\text{CaCO}_3/\text{DOX45}$     ●  $\text{Fe}_3\text{O}_4@\text{CaCO}_3/\text{DOX25}$

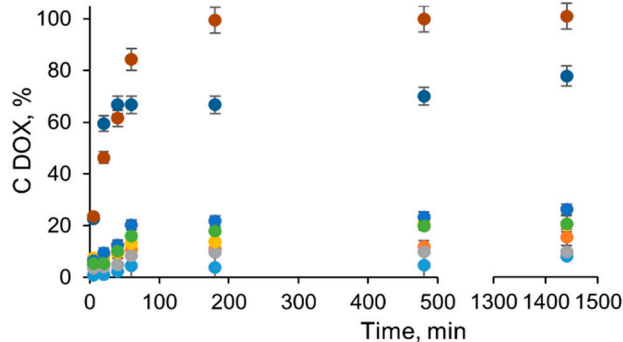

**Figure S5.** The proportion of DOX release from  $\text{Fe}_3\text{O}_4@\text{CaCO}_3/\text{DOX}$  (capacity, 25–1900  $\mu\text{g}/\text{mg}$ ) at pH 4.0 (A, C); pH 6.0 (B, D).

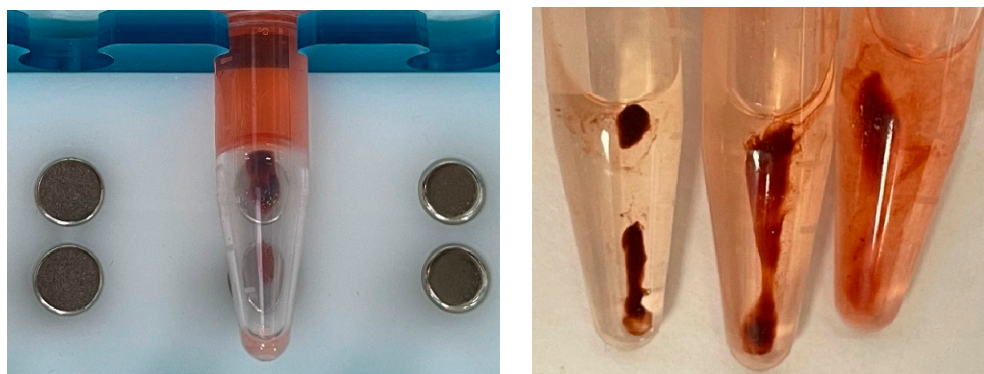

**Figure S6.** The confirmation of DOX-loading by photography. The left photograph also shows magnetic behavior on the magnetic tube rack.

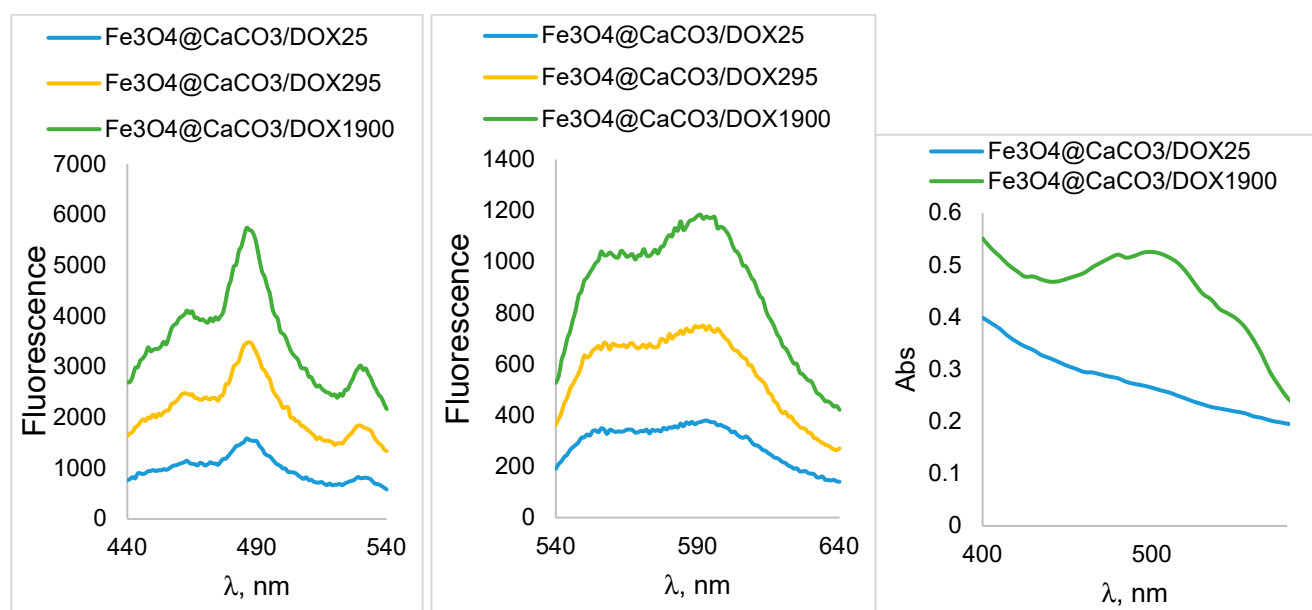

**Figure S7.** Fluorescence and UV-vis spectra of  $\text{Fe}_3\text{O}_4@\text{CaCO}_3/\text{DOX}$  nanocomposites. The measurements were carried out using 100  $\mu\text{l}$  of the solution on the Clariostar (BMG Labtech, Ortenberg, Germany).
